# Supplementary material for: Transcriptional organization and regulation of the Pseudomonas putida K1 type VI secretion system gene cluster
Source: PubMed Central journal article supplement (PMC9993120; doi:10.1099/mic.0.001295), 2023-01-27
Supplement: mic-169-1295-s001.pdf [file mic-169-1295-s001.pdf]

# SUPPLEMENTARY FILE FOR

## Transcriptional organization and regulation of the *Pseudomonas putida* K1 Type VI secretion system gene cluster

Patricia Bernal<sup>1,2,3\*</sup>, Cristina Civantos<sup>1</sup>, Daniel Pacheco-Sánchez<sup>1</sup>, José M. Quesada<sup>1</sup>, Alain Filloux<sup>2,4\*</sup> and María A. Llamas<sup>1\*</sup>

<sup>1</sup>Department of Environmental Protection, Estación Experimental del Zaidín (CSIC), Granada, Spain

<sup>2</sup>MRC Centre for Molecular Bacteriology and Infection, Department of Life Sciences, Imperial College London, London, UK

<sup>3</sup>Departamento de Microbiología, Facultad de Biología, Universidad de Sevilla, 41012 Seville, Spain

<sup>4</sup>Singapore Centre for Environmental Life Sciences Engineering. Nanyang Technological University, Singapore

\*Correspondence:

P. Bernal, Departamento de Microbiología, Facultad de Biología, Universidad de Sevilla, 41012 Seville, Spain. E-mail: [pbernal@us.es](mailto:pbernal@us.es)

Alain Filloux, MRC Centre for Molecular Bacteriology and Infection, Department of Life Sciences, Imperial College London, London, UK. E-mail: [a.filloux@imperial.ac.uk](mailto:a.filloux@imperial.ac.uk)

María A. Llamas, Department of Environmental Protection, Estación Experimental del Zaidín (CSIC), Granada, Spain. E-mail: [marian.llamas@eez.csic.es](mailto:marian.llamas@eez.csic.es)

### This file includes:

Figure S1 and S2  
Supplementary Tables 1, 2, 3 and 4  
Supplementary references

## SUPPLEMENTARY INFORMATION FIGURE

Figure S1

A

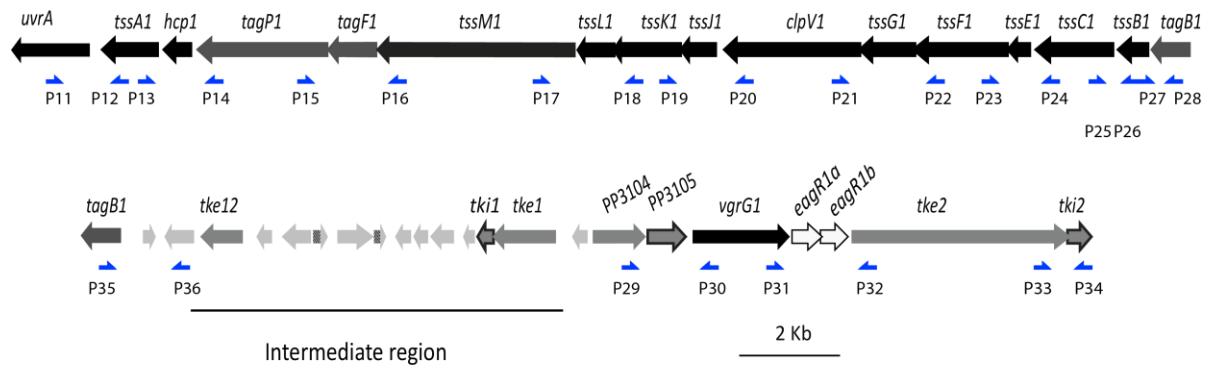

B

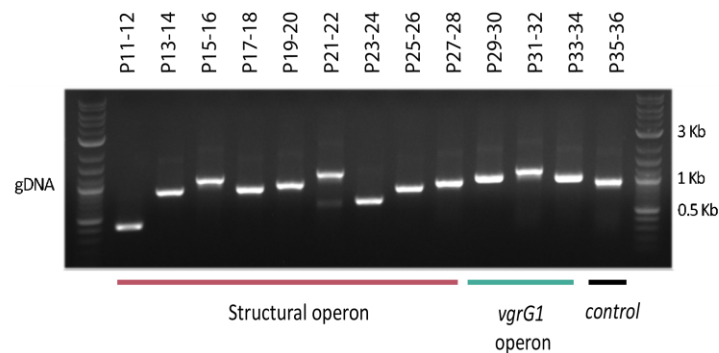

**Figure S1.** (A) Transcriptional organisation of the K1-T6SS cluster. The genes are located in a 44-kb chromosomal region, which includes the T6SS genes organised in 2 operons and an intermediate region. The primer pairs used to perform RT-PCR are shown in blue and the sequence can be found below in Table 3. (B) PCR analysis with gDNA of *P. putida* KT2440 as control for primer pairs used in RT-PCR analysis shown in Figure 2 to define the transcriptional units of the K1-T6SS cluster. Primer pairs from P11 to P28 were used to amplify gDNA from the structural operon and primer pairs from P29 to P34 were used to amplify gDNA of the *vgrG* operon. Primer pair P35-P36 was used as a negative control in RT-PCR analysis from a non-transcribed region. The band amplified from gDNA confirmed

the functionality of the primer pair used in this assay. (C) Primer extension analysis of total RNA of *P. putida* with primers for P<sub>v</sub> to map the transcription start site. The DNA sequence patterned using the DNA Cycle Sequencing kit based on the Sanger method is included in the urea-polyacrylamide sequencing gel.

**Figure S2**

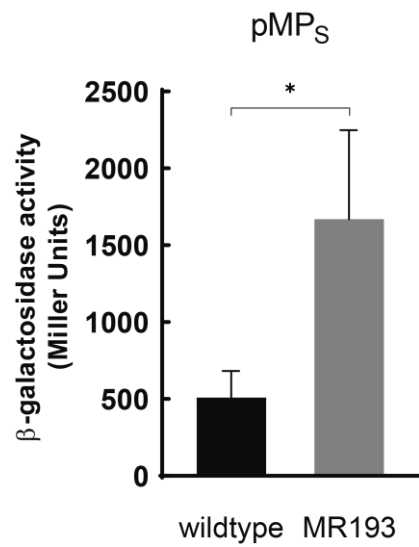

**Figure S2. Expression of the K1-T6SS structural genes.**  $\beta$ -galactosidase activity, in stationary phase, of the *P. putida* wild-type and the *rpoS* mutant MR193 strains bearing the pMP220-derivated plasmid containing the P<sub>S</sub> transcriptional fusion to the *lacZ* gene. Strains were grown in LB until stationary phase. Data are means  $\pm$  SD of three replicates, each one including two technical replicates. P values were calculated by *t*-test analysis as described in Methods.

## SUPPLEMENTARY INFORMATION TABLES

**Table S1.** Bacterial strains used in this study.

| <b>Name</b>                      | <b>Description</b>                                                                                                                                                                                                          | <b>Source</b> |
|----------------------------------|-----------------------------------------------------------------------------------------------------------------------------------------------------------------------------------------------------------------------------|---------------|
| <b><i>Escherichia coli</i></b>   |                                                                                                                                                                                                                             |               |
| DH5 $\alpha$                     | F <sup>-</sup> <i>endA1 glnV44 thi-1 recA1 relA1 gyrA96 deoR nupG purB20 <math>\phi</math>80dlacZ<math>\Delta</math>M15 <math>\Delta</math>(lacZYA-argF)U169 hsdR17(<math>r_{K^-}m_{K^+}</math>) <math>\lambda^-</math></i> | [1]           |
| <b><i>Pseudomonas putida</i></b> |                                                                                                                                                                                                                             |               |
| KT2440R                          | Rif <sup>R</sup>                                                                                                                                                                                                            | [2]           |
| KT2440R <i>gacS</i>              | <i>gacS</i> ::Tn5, Kan <sup>R</sup>                                                                                                                                                                                         | [3]           |
| KT2440R <i>retS</i>              | <i>retS</i> ::Tn5, Kan <sup>R</sup>                                                                                                                                                                                         | [3]           |
| KT2440R <i>fleQ</i>              | <i>fleQ</i> ::Tn5, Kan <sup>R</sup>                                                                                                                                                                                         | [4]           |
| KT2440 <i>rpoS</i>               | Markerless mutant                                                                                                                                                                                                           | [5]           |
| KT2440R <i>rpoN</i>              | <i>rpoN</i> :: <i>aphA</i> , Kan <sup>R</sup>                                                                                                                                                                               | [6]           |
| KT2442 <i>turA</i>               | <i>turA</i> :: <i>aphA</i> , Kan <sup>R</sup> Rif <sup>R</sup>                                                                                                                                                              | [7]           |
| KT2442 <i>rpoS</i> (MRB193)      | Cm <sup>R</sup> , Rif <sup>R</sup>                                                                                                                                                                                          | F. Govantes   |

**Table S2.** Plasmids used in this study.

| <b>Name</b>          | <b>Description</b>                                                                                                                                     | <b>Source</b> |
|----------------------|--------------------------------------------------------------------------------------------------------------------------------------------------------|---------------|
| pMP220               | Broad host range, low copy number promoter-probe vector based on the <i>lacZ</i> reporter gene ( <i>lacZ</i> ), Tet <sup>R</sup>                       | [8]           |
| pMP <sub>hcp1</sub>  | <i>P. putida</i> P <sub>hcp1</sub> promoter region cloned into pMP220 as a transcriptional fusion, P <sub>hcp1</sub> :: <i>lacZ</i> , Tet <sup>R</sup> | This study    |
| pMP <sub>tagB1</sub> | <i>P. putida</i> P <sub>tagB1</sub> promoter cloned into pMP220 as a transcriptional fusion, P <sub>tagB1</sub> :: <i>lacZ</i> , Tet <sup>R</sup>      | This study    |
| pMP <sub>vgrG1</sub> | <i>P. putida</i> P <sub>vgrG1</sub> promoter cloned into pMP220 as a transcriptional fusion, P <sub>vgrG1</sub> :: <i>lacZ</i> , Tet <sup>R</sup>      | This study    |
| pMPPP3084            | <i>P. putida</i> P <sub>PP3084</sub> promoter cloned into pMP220 as a transcriptional fusion, P <sub>PP3084</sub> :: <i>lacZ</i> , Tet <sup>R</sup>    | This study    |
| pMMB67EH             | IncQ broad-host range plasmid, <i>lacIq</i> ; Ap <sup>R</sup>                                                                                          | [9]           |
| pMMBPP3086           | pMMB67EH carrying the <i>P. putida</i> PP3086 gene and promoter region; Ap <sup>R</sup>                                                                | This study    |

**Table S3.** Oligonucleotide primers used in this study. The “Brief description” column provides basic information on the primer design (restriction enzyme used for cloning, encoded protein, forward or reverse orientation of the primer (F or R); QRT stands for qRT-PCR primers, PE stands for Primer Extension primers and RACE stands for Rapid Amplification of cDNA Ends primers) after the / symbol it is indicated the vector where the PCR product have been cloned.

| Number | Brief description                   | Sequence (5'-3')                  |
|--------|-------------------------------------|-----------------------------------|
| P1     | <i>hcp1</i> .EcoRI.F / pMP220       | GGCCGCgaattcACCATCACGCTGGAATCCG   |
| P2     | <i>hcp1</i> .KpnI.R / pMP220        | GGTATAggtaccGTAAGGGTTGCTCATGCGC   |
| P3     | <i>tagB1</i> .EcoRI.F / pMP220      | CCGGgaattcGCGCACAAAATGAGAAC       |
| P4     | <i>tagB1</i> .KpnI.R / pMP220       | CCTAgttaccATGTGCCTGCTTGATCGT      |
| P5     | <i>PP3104</i> .EcoRI.F / pMP220     | GCTAgaattcACACCTGCCAGGCAGAT       |
| P6     | <i>PP3104</i> .PstI.R / pMP220      | ATATctgcagTGGGGTCGGCTGCGGTA       |
| P7     | <i>PP3084</i> .EcoRI.F / pMP220     | ATATgaattcCGCTACTGGGTAAGTGTGG     |
| P8     | <i>PP3084</i> .XbaI.R / pMP220      | TATActtagaTGTGGGTGCAGAAATGAAGGTTC |
| P9     | <i>PP3086</i> .EcoRI.F / pMMB67EH   | AATTgaattcGGTCAGTGGCACGCCGCAG     |
| P10    | <i>PP3086</i> .HindIII.R / pMMB67EH | AATTaagcttGCCGCTTCGCCAGGATCAG     |
| P11    | <i>uvrA-tssA1</i> .F                | GAACGCCAACGAGGACTT                |
| P12    | <i>uvrA-tssA1</i> .R                | GGCAACATGCCGTTGGAA                |
| P13    | <i>tssA1-tagP1</i> .F               | CCAGCGAGAGGTCATTGAGA              |
| P14    | <i>tssA1-tagP1</i> .R               | CAACCGCGAACGCAGTTGAT              |
| P15    | <i>tagP1-tssM1</i> .F               | CCAGGAAGATCGCCAGGAAG              |
| P16    | <i>tagP1-tssM1</i> .R               | CTTGTCGTGCGCAACTTCGG              |
| P17    | <i>tssM1-tssK1</i> .F               | CAATGGCAGCAGCAACCAGA              |
| P18    | <i>tssM1-tssK1</i> .R               | CAGGCCATCTGCTTCTATGC              |
| P19    | <i>tssK1-clpV1</i> .F               | ACATGCCTTCCGACCACATC              |
| P20    | <i>tssK1-clpV1</i> .R               | CGCAACATCGACAACATCCT              |
| P21    | <i>clpV1-tssF1</i> .F               | GACCACTTCTTCGGCCAGTA              |
| P22    | <i>clpV1-tssF1</i> .R               | TCAGGCCAGGTTCAACAAGGCGACC         |
| P23    | <i>tssF1-tssC1</i> .F               | AAGCGCAGGTGCGACAGTTC              |
| P24    | <i>tssF1-tssC1</i> .R               | AAGGCCGTGACCTACTTGCG              |
| P25    | <i>tssC1-tssB1</i> .F               | CATCTGCTCGGAGAGCATCG              |
| P26    | <i>tssC1-tssB1</i> .R               | AATTGCTCGCACTGGAGAAC              |
| P27    | <i>tssB1-tagB1</i> .F               | ATGTCCACGTCGTAGGTGAT              |
| P28    | <i>tssB1-tagB1</i> .R               | ATGGACGATGCACCAATGAC              |
| P29    | <i>PP3104-vgrG1</i> .F              | CCGGCTATAGTCGTGATTGC              |
| P30    | <i>PP3104-vgrG1</i> .R              | GCAAGGCCAGATCGAATTCA              |
| P31    | <i>vgrG1-tke2</i> .F                | TCGGCAGCATCCAGATTCC               |

|     |                         |                              |
|-----|-------------------------|------------------------------|
| P32 | <i>vgrG1-tke2.R</i>     | CTCCTGTTCCGAAGCCATCGAGCATGC  |
| P33 | <i>tke2-tki2.F</i>      | ATGCGTTATGTCACTCAGGACC       |
| P34 | <i>tke2-tki2.R</i>      | CCCAAGACCTGTCAACTTGAT        |
| P35 | <i>tagB1-PP3101.3.F</i> | TGCTGCGCTGTGCGCCTTGCAGGTATTC |
| P36 | <i>tagB1-PP3101.3.R</i> | CGATGGTTCGTTGAGTTGGAT        |
| P37 | <i>hcp1.QRT.F</i>       | CCAGGCCGAAGTACTGGATGA        |
| P38 | <i>hcp1.QRT.R</i>       | GCCTTGCGGATCTTGAAGTC         |
| P39 | <i>tssB1.QRT.F</i>      | AATTGCTCGCACTGGAGAAC         |
| P40 | <i>tssB1.QRT.R</i>      | ATGTCCACGTCGTAGGTGAT         |
| P41 | <i>PP3084.QRT.F</i>     | AGCCGTACCGCTTGCCTTTG         |
| P42 | <i>PP3084.QRT.R</i>     | AAAGCGCGCCAGTACATCGG         |
| P43 | 16SrRNA.QRT.F           | AAAGCCTGATCCAGCCAT           |
| P44 | 16SrRNA.QRT.R           | GAAATTCCACCACCCTCTACC        |
| P45 | <i>tagB1.PE</i>         | GCCTGCTTGATCGTCCTGAA         |
| P46 | <i>tagB1.RACE</i>       | TGCTGCGCTGTGCGCCTTGCAGGTATTC |
| P47 | <i>PP3104.RACE</i>      | CGTAGGTTCTGGCTGCTACAACACTTGG |



**Table S4.** The K1-T6SS genomic region. The table compiles information of the loci conforming the K1-T6SS clusters previously identified (Bernal et. al., 2017). Most genes in the intermediate region and downstream *tki2* are partial genes (~200 bps) and are not taken into consideration in this study.

\*Nucleotides between continuous genes

\*\*Overlapping nucleotides

| Locus name                 | Gene name                  | Genomic location             | Continuous genes   | *   | **        |
|----------------------------|----------------------------|------------------------------|--------------------|-----|-----------|
| <b>Structural operon</b>   |                            |                              |                    |     |           |
| PP5562                     | <i>tagB1</i>               | 3496832 - 3497596 (- strand) |                    |     |           |
| PP3100                     | <i>tssB1</i>               | 3496228 - 3496803 (- strand) | <i>tagB1-tssB1</i> | 28  |           |
| PP3099                     | <i>tssC1</i>               | 3494711 - 3496213 (- strand) | <i>tssB1-tssC1</i> | 14  |           |
| PP3098                     | <i>tssE1</i>               | 3494202 - 3494684 (- strand) | <i>tssC1-tssE1</i> | 26  |           |
| PP3097                     | <i>tssF1</i>               | 3492382 - 3494202 (- strand) | <i>tssE1-tssF1</i> | --  | <b>1</b>  |
| PP3096                     | <i>tssG1</i>               | 3491348 - 3492418 (- strand) | <i>tssF1-tssG1</i> | --  | <b>37</b> |
| PP3095                     | <i>tssH1/clpV1</i>         | 3488754 - 3491390 (- strand) | <i>tssG1-clpV1</i> | --  | <b>43</b> |
| PP3094                     | <i>tssJ1</i>               | 3488007 - 3488729 (- strand) | <i>clpV1-tssJ1</i> | 24  |           |
| PP3093                     | <i>tssK1</i>               | 3486667 - 3488010 (- strand) | <i>tssJ1-tssK1</i> | --  | <b>4</b>  |
| PP3092                     | <i>tssL1</i>               | 3485954 - 3486670 (- strand) | <i>tssK1-tssL1</i> |     | <b>4</b>  |
| PP3091                     | <i>tssM1</i>               | 3482120 - 3485923 (- strand) | <i>tssL1-tssM1</i> | 30  |           |
| PP5561                     | <i>tagF1</i>               | 3481215 - 3482123 (- strand) | <i>tssM1-tagF1</i> | --  | <b>4</b>  |
| PP3090                     | <i>tagP1</i>               | 3478723 - 3481218 (- strand) | <i>tagF1-tagP1</i> | --  | <b>4</b>  |
| PP3089                     | <i>tssD1/hcp1</i>          | 3478061 - 3478603 (- strand) | <i>tagP1-hcp1</i>  | 119 |           |
| PP3088                     | <i>tssA1</i>               | 3476880 - 3477965 (- strand) | <i>hcp1-tssA1</i>  | 95  |           |
| <b>Intermediate region</b> |                            |                              |                    |     |           |
| PP5563                     |                            | 3498302 - 3498853 (- strand) |                    |     |           |
| PP3101                     | ADP-ribosyl glycohydrolase | 3498998 - 3499780 (+ strand) |                    |     |           |
| PP5565                     |                            | 3500053 - 3500325 (- strand) |                    |     |           |
| PP5566                     |                            | 3500542 - 3500781 (- strand) |                    |     |           |
| PP5567                     |                            | 3501267 - 3501458 (+ strand) |                    |     |           |
| PP5568                     |                            | 3501614 - 3502312 (+ strand) |                    |     |           |
| PP5569                     |                            | 3502346 - 3502549 (+ strand) |                    |     |           |
| PP5571                     |                            | 3502704 - 3503015 (- strand) |                    |     |           |
| PP5572                     |                            | 3503024 - 3503305 (- strand) |                    |     |           |
| PP5573                     |                            | 3504009 - 3504185 (- strand) |                    |     |           |
| PP3103                     | <i>tke1</i>                | 3504568 - 3505641 (- strand) |                    |     |           |
| PP3102                     | <i>tki1</i>                | 3504275 - 3504571 (- strand) | <i>tke1-tki1</i>   | --  | <b>4</b>  |
| PP5574                     |                            |                              |                    |     |           |

| <b>VgrG1 operon</b> |                    |                              |                                  |    |           |
|---------------------|--------------------|------------------------------|----------------------------------|----|-----------|
| PP3104              |                    | 3506683 - 3507651 (+ strand) |                                  |    |           |
| PP3105              |                    | 3507652 - 3508347 (+ strand) | PP3104-PP3105                    | 0  |           |
| PP3106              | <i>tssII/vgrG1</i> | 3508373 - 3510229 (+ strand) | PP3105- <i>vgrG1</i>             | 25 |           |
| PP5575              | <i>eagR1a</i>      | 3510240 - 3510824 (+ strand) | <i>vgrG1-eagR1a</i>              | 10 |           |
| PP3107              | <i>eagR1b</i>      | 3510805 - 3511326 (+ strand) | <b><i>eagR1a-<br/>eagR1b</i></b> | -- | <b>20</b> |
| PP3108              | <i>tke2</i>        | 3511333 - 3515490 (+ strand) | <i>eagR1b-tke2</i>               | 6  |           |
| PP5576              | <i>tki2</i>        | 3515484 - 3515960 (+ strand) | <b><i>tke2-tki2</i></b>          | -- | <b>7</b>  |
| PP5577              |                    | 3516296 - 3516919 (+ strand) |                                  |    |           |
| PP5578              |                    | 3517095 - 3517625 (+ strand) |                                  |    |           |
| PP3109              |                    | 3517884 - 3518315 (+ strand) |                                  |    |           |
| PP5579              |                    | 3518374 - 3518853 (+ strand) |                                  |    |           |
| PP5580              |                    | 3519154 - 3519381 (+ strand) |                                  |    |           |
| <b>PP3109.4</b>     | <i>tke3</i>        | 3520128 - 3520717 (+ strand) |                                  |    |           |
| PP5582              | <i>tki3</i>        | 3520261 - 3520728 (+ strand) | <i>tke3-tki3</i>                 | 11 |           |
| PP5583              |                    | 3521488 - 3521847 (+ strand) |                                  |    |           |
| PP3110              |                    | 3521807 - 3522019 (+ strand) |                                  |    |           |
| PP3111              |                    | 3522028 - 3522213 (+ strand) |                                  |    |           |

## SUPPLEMENTARY REFERENCES

1. **Hanahan D.** Techniques for transformation of *E. coli*. In: Glover DM (editor). *DNA Cloning: A Practical Approach*. Virginia; 1985. p. 109.
2. **Espinosa-Urgel M, Salido A, Ramos J-L.** Genetic Analysis of Functions Involved in Adhesion of *Pseudomonas putida* to Seeds. *Journal of Bacteriology* 2000;182:2363–2369.
3. **Molina-Henares MA, de la Torre J, García-Salamanca A, Molina-Henares AJ, Herrera MC, et al.** Identification of conditionally essential genes for growth of *Pseudomonas putida* KT2440 on minimal medium through the screening of a genome-wide mutant library. *Environmental Microbiology* 2010;12:1468–1485.
4. **Yousef-Coronado F, Travieso ML, Espinosa-Urgel M.** Different, overlapping mechanisms for colonization of abiotic and plant surfaces by *Pseudomonas putida*. *FEMS Microbiology Letters* 2008;288:118–124.
5. **Ramos-González MI, Molin S.** Cloning, sequencing, and phenotypic characterization of the *rpoS* gene from *Pseudomonas putida* KT2440. *Journal of Bacteriology* 1998;180:3421–3431.
6. **Köhler T, Harayama S, Ramos JL, Timmis KN.** Involvement of *Pseudomonas putida* RpoN sigma factor in regulation of various metabolic functions. *Journal of Bacteriology* 1989;171:4326–4333.
7. **Renzi F, Rescalli E, Galli E, Bertoni G.** Identification of genes regulated by the MvaT-like paralogues TurA and TurB of *Pseudomonas putida* KT2440. *Environmental Microbiology* 2010;12:254–263.
8. **Spaink HP, Okker RJH, Wijffelman CA, Pees E, Lugtenberg BJJ.** Promoters in the nodulation region of the *Rhizobium leguminosarum* Sym plasmid pRL1J1. *Plant Molecular Biology* 1987;9:27–39.
9. **Fürste JP, Pansegrau W, Frank R, Blöcker H, Scholz P, et al.** Molecular cloning of the plasmid RP4 primase region in a multi-host-range *tacP* expression vector. *Gene* 1986;48:119–131.
